# Supplementary material
Source: publisher figshare collection journal article supplement (https://acs.figshare.com/ndownloader/files/12860312)
Supplement: Supplementary file 1 [file 12860312]

## Cover sheet for SI

Authors:

Chun-Yu Lai, Qiu-Yi Dong, Jia-Xian Chen, Quan-Song Zhu, Xin Yang, Wen-Da Chen,  
He-Ping Zhao, Liang Zhu\*

Manuscript title: Role of Extracellular Polymeric Substances in a Methane Based  
Membrane Biofilm Reactor Reducing Vanadate

Number of pages: 4

Number of tables: 1

Number of figures: 2

# **Role of Extracellular Polymeric Substances in a Methane Based Membrane Biofilm Reactor Reducing Vanadate**

Chun-Yu Lai<sup>1, 5</sup>, Qiu-Yi Dong<sup>1</sup>, Jia-Xian Chen<sup>1</sup>, Quan-Song Zhu<sup>1</sup>, Xin Yang<sup>1</sup>, Wen-Da Chen<sup>1</sup>, He-Ping Zhao<sup>1, 2, 3</sup>, Liang Zhu<sup>1, 2, 3, \*</sup>

1. College of Environmental and Resource Science, Zhejiang University, Hangzhou, China.
2. Zhejiang Prov Key Lab Water Pollut Control & Envi, Zhejiang University, Hangzhou, Zhejiang, China.
3. MOE Key Lab of Environmental Remediation and Ecosystem Health, College of Environmental and Resource Science, Zhejiang University, Hangzhou, China, 310058.
4. Advanced Water Management Centre, The University of Queensland, St Lucia, Queensland 4072, Australia

\* Correspondance to Dr. Liang Zhu, Email: [felix79cn@zju.edu.cn](mailto:felix79cn@zju.edu.cn);

and Dr. He-Ping Zhao. E-mail: [zhaohp@zju.edu.cn](mailto:zhaohp@zju.edu.cn)

**Table S1.** Fluorescence spectral parameters of EPS in the biofilm of each stage determined by 3D-EEM.

|          | Peak A (Tryptophan) |     |           | Peak B (Humic acid) |     |           | Peak C (aromatic protein-like substances) |     |           |
|----------|---------------------|-----|-----------|---------------------|-----|-----------|-------------------------------------------|-----|-----------|
|          | Ex                  | Em  | Intensity | Ex                  | Em  | Intensity | Ex                                        | Em  | Intensity |
| Inoculum | 280                 | 305 | 2799      | -                   | -   | -         | -                                         | -   | -         |
| Stage 1  | 290                 | 335 | 2943      | 365                 | 445 | 592       | 230                                       | 325 | 868       |
| Stage 2  | 290                 | 345 | 3102      | 355                 | 440 | 2046      | 230                                       | 335 | 707       |
| Stage 3  | 290                 | 340 | 3177      | 365                 | 445 | 969       | -                                         | -   | -         |
| Stage 4  | 285                 | 345 | 3229      | 355                 | 440 | 2356      | 230                                       | 325 | 1016      |

**Table S2.** Absorbance of EPS in the biofilms of each stage measured by FTIR.

|                  | Inoculum | Stage 1 | stage 2 | stage 3 | stage 4 |
|------------------|----------|---------|---------|---------|---------|
| OH <sup>-</sup>  | 0.410    | 0.482   | 0.828   | 0.419   | 0.968   |
| C-H              | 0.145    | 0.159   | 0.447   | 0.178   | 0.457   |
| C=O              | 0.256    | 0.305   | 0.655   | 0.249   | 0.636   |
| COO <sup>-</sup> | 0.104    | 0.131   | 0.392   | 0.135   | 0.375   |
| O-C-O            | 0.175    | 0.186   | 0.504   | 0.195   | 0.481   |

**Table S3.** Pearson Correlation analysis of V(V) flux and predominant genus in the biofilms of all stages.

|                        |                     | V(V) flux | <i>Methylomonas</i> | <i>Methylophilus</i> | <i>Denitratisoma</i> | <i>Methylococcus</i> | <i>Ignavibacterium</i> | <i>Meiothermus</i> |
|------------------------|---------------------|-----------|---------------------|----------------------|----------------------|----------------------|------------------------|--------------------|
| V(V) flux              | Pearson Correlation | 1         | <b>.970*</b>        | .754                 | <b>.996**</b>        | .327                 | .619                   | -.280              |
|                        | Sig. (2-tailed)     |           | .030                | .246                 | .004                 | .673                 | .381                   | .720               |
| <i>Methylomonas</i>    | Pearson Correlation | .970*     | 1                   | .681                 | .987*                | .090                 | .758                   | -.463              |
|                        | Sig. (2-tailed)     | .030      |                     | .319                 | .013                 | .910                 | .242                   | .537               |
| <i>Methylophilus</i>   | Pearson Correlation | .754      | .681                | 1                    | .725                 | .376                 | .056                   | -.382              |
|                        | Sig. (2-tailed)     | .246      | .319                |                      | .275                 | .624                 | .944                   | .618               |
| <i>Denitratisoma</i>   | Pearson Correlation | .996**    | .987*               | .725                 | 1                    | .249                 | .677                   | -.337              |
|                        | Sig. (2-tailed)     | .004      | .013                | .275                 |                      | .751                 | .323                   | .663               |
| <i>Methylococcus</i>   | Pearson Correlation | .327      | .090                | .376                 | .249                 | 1                    | -.360                  | .712               |
|                        | Sig. (2-tailed)     | .673      | .910                | .624                 | .751                 |                      | .640                   | .288               |
| <i>Ignavibacterium</i> | Pearson Correlation | .619      | .758                | .056                 | .677                 | -.360                | 1                      | -.451              |
|                        | Sig. (2-tailed)     | .381      | .242                | .944                 | .323                 | .640                 |                        | .549               |
| <i>Meiothermus</i>     | Pearson Correlation | -.280     | -.463               | -.382                | -.337                | .712                 | -.451                  | 1                  |
|                        | Sig. (2-tailed)     | .720      | .537                | .618                 | .663                 | .288                 | .549                   |                    |

\*Significant correlation on the 0.05 level (2-tailed).

\*\*Significant correlation on the 0.01 level (2-tailed).

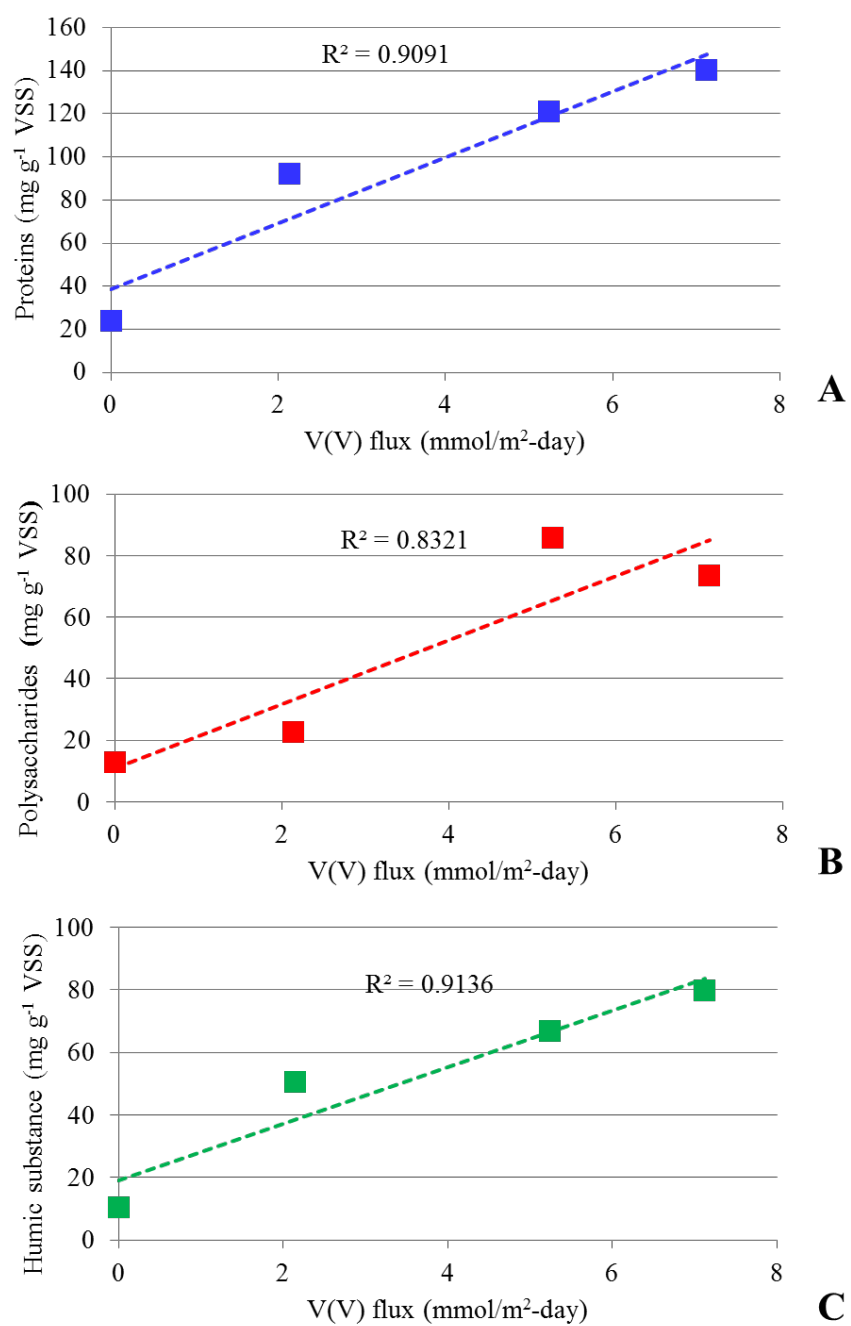

**Figure S1.** Linear relationship between V(V) flux and proteins (A), polysaccharides (B), and humic acid substances (C) in Stages 1, 2 and 4.

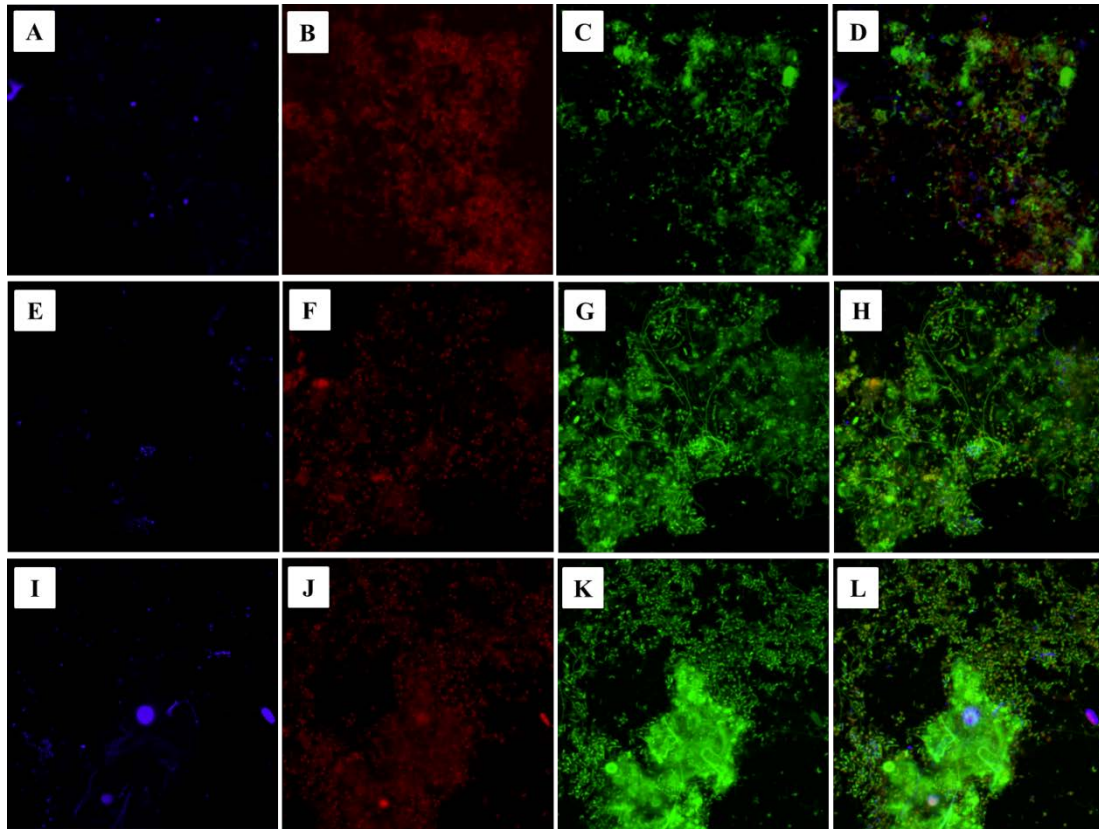

**Figure S2.** CLSM images targeting biofilms of Stage 1, 2 and 4. The spatial distribution of  $\alpha$ -polysaccharides (A),  $\beta$ -polysaccharides (B), proteins (C), and combined image (D) of Stage 1; The spatial distribution of  $\alpha$ -polysaccharides (E),  $\beta$ -polysaccharides (F), proteins (G), and combined image (H) of Stage 2; The spatial distribution of  $\alpha$ -polysaccharides (I),  $\beta$ -polysaccharides (J), proteins (K), and combined image (L) of Stage 4.
